# Supplementary material for: Energy-loss return gate via liquid dielectric polarization
Source: PubMed Central journal article supplement (PMC5897353; doi:10.1038/s41467-018-03893-7), 2018-04-12
Supplement: 41467_2018_3893_MOESM1_ESM.pdf [file 41467_2018_3893_MOESM1_ESM.pdf]

# Energy-Loss Return Gate via Liquid Dielectric Polarization

*Taehun Kim*+, *Hyungseok Yong*+, *Banseok Kim*, *Dongseob Kim*, *Dukhyun Choi*, *Yong Tae Park*\*,  
and *Sangmin Lee*\* (+Equal contribution) (\*Corresponding author)

## Affiliations

T. Kim, H. Yong, B. Kim, Prof. S. Lee

School of Mechanical Engineering

Chung-Ang University

84, Heukseuk-ro, Dongjack-gu, Seoul 156-756, KOREA

E-mail: [slee98@cau.ac.kr](mailto:slee98@cau.ac.kr)

Dr. D. Kim

Aircraft System Technology Group

Korea Institute of Industrial Technology

57, Yangho-gil, Yeongcheon-si, Gyeongbuk-do, 38822, KOREA

Prof. D. Choi

Department of Mechanical Engineering

Kyung Hee University

1732, Deogyong-daero, Giheung, Yongin, Gyeonggi 446-701, KOREA

Prof. Y. T. Park

Department of Mechanical Engineering

Myongji University

116, Myongji-ro, Cheoin-gu, Yongnin, Gyeonggi 17058, KOREA

E-mail: [ytpark@mju.ac.kr](mailto:ytpark@mju.ac.kr)

# Supplementary Figure

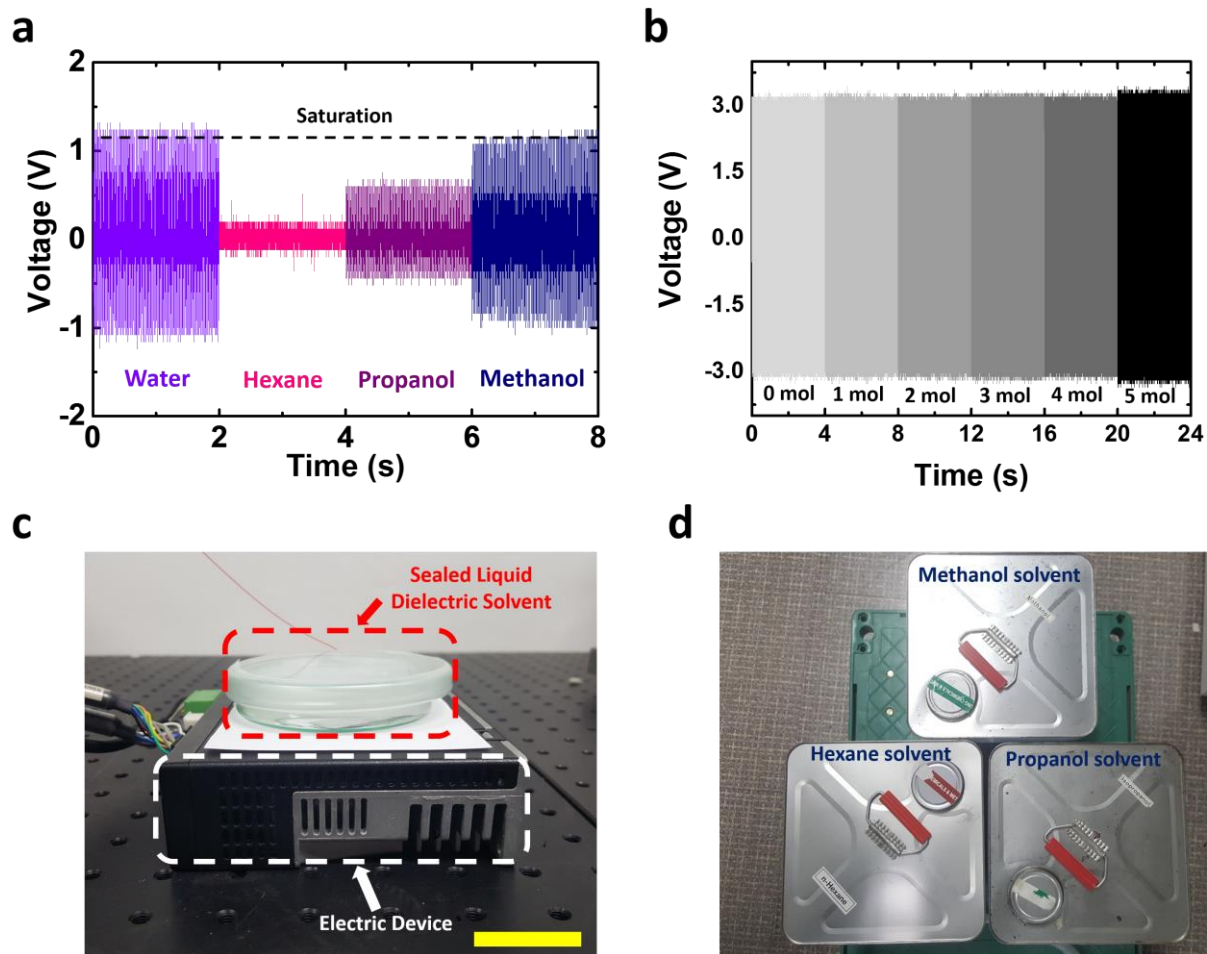

**Supplementary Figure 1 ELRG electric outputs under various liquid dielectric properties.** Electric device is plugged into a 60-Hz AC input electrical source. **a.** ELRG open-circuit voltage output with four different liquid materials. Dashed black line represents the saturation point. **b.** ELRG open-circuit voltage output under different ion concentrations. **c.** Image of real experimental setup with sealed liquid dielectric solvent and electric device, with yellow bar representing 3-cm scale. **d.** Image of solvents introduced in the experiments

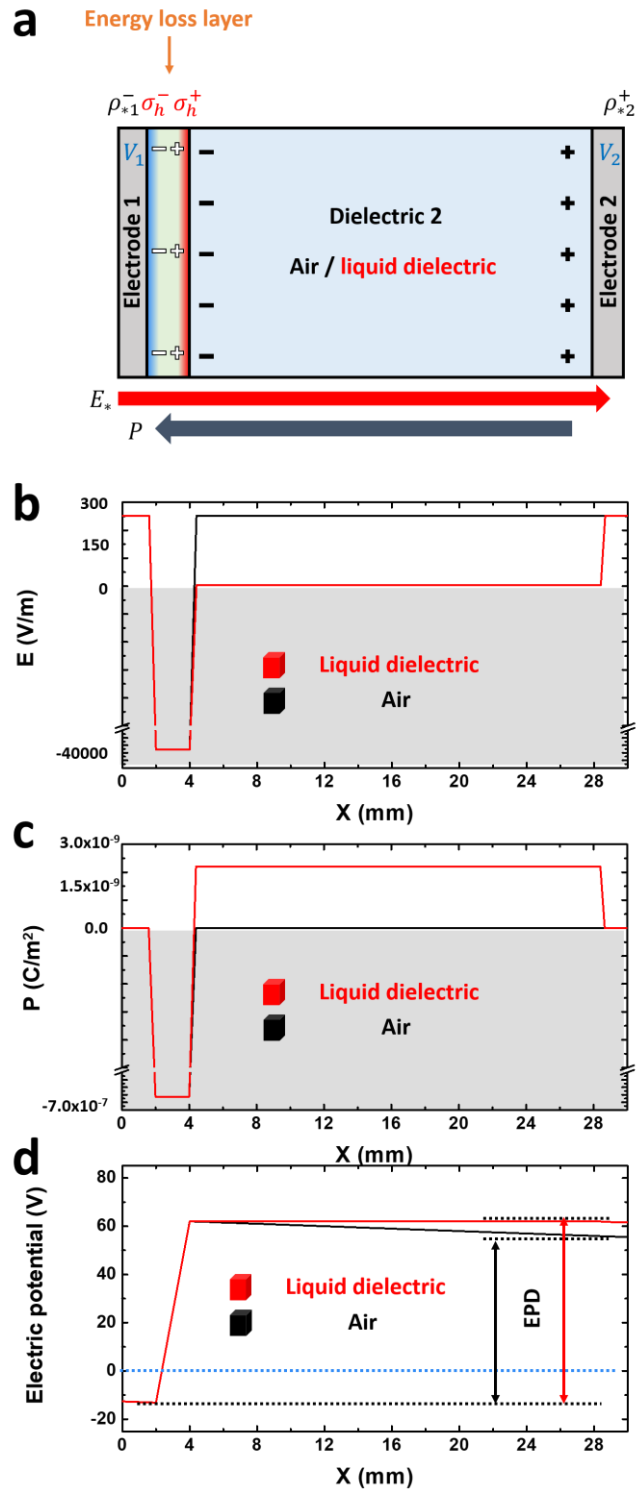

**Supplementary Figure 2 Conformation and resultant of electrostatic simulation. a.** Simulation scheme for calculating electric properties. **b.** Plot showing electric field distribution. **c.** Plot showing polarization distribution **d.** Plot showing electric potential distribution

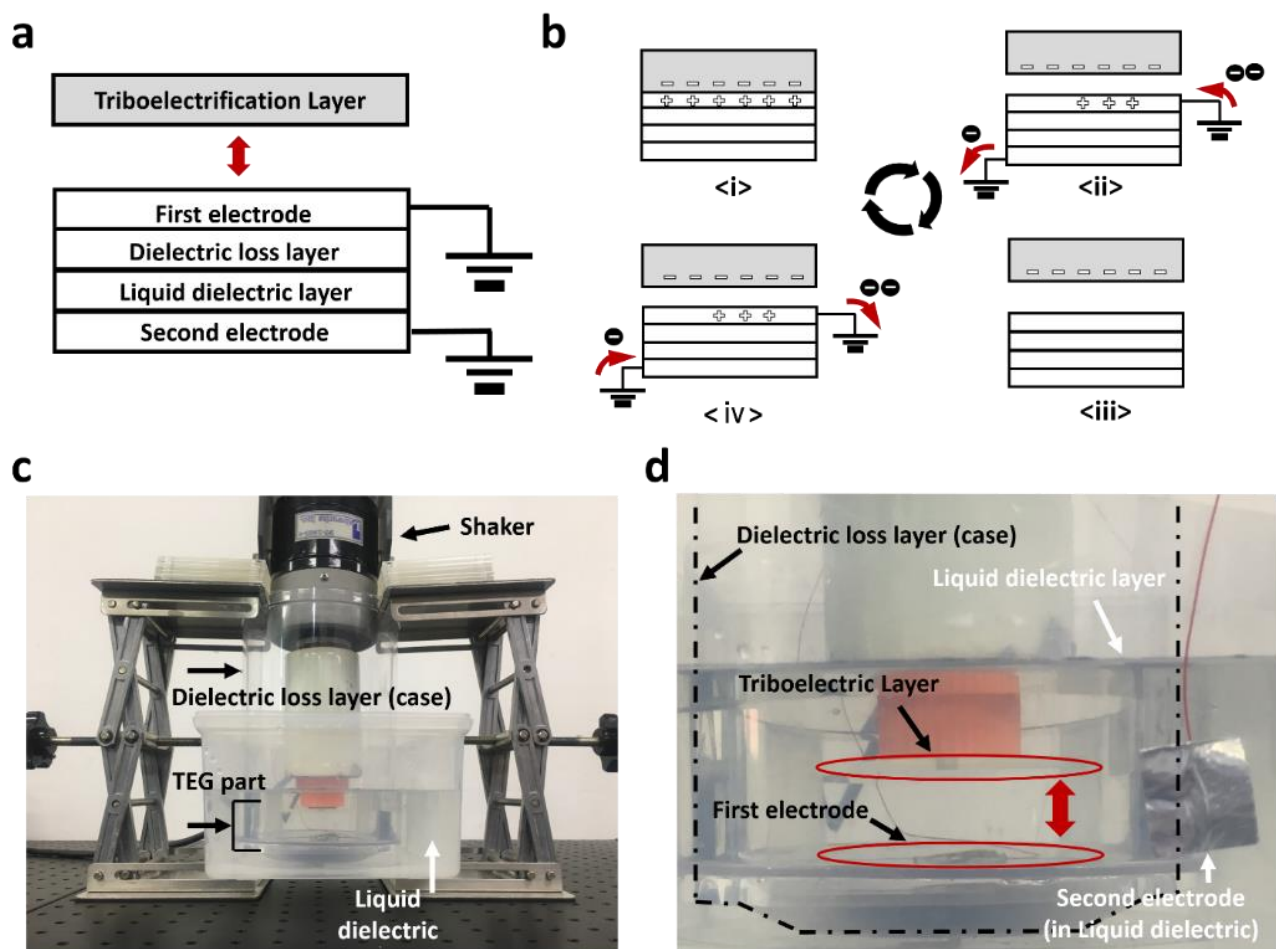

**Supplementary Figure 3 Mechanism of triboelectric electricity generation.** **a.** Conformation of a TEG. **b.** Schematic illustration showing step-by-step mechanism of a TEG. (i) Contact state; triboelectric layer and electrode are in charge equilibrium state; (ii) separation process (first electrode acquires free electrons and second electrode releases free electrons); (iii) separation state; triboelectric layer and electrode are in charge equilibrium state; and (iv) contact process (first electrode releases free electrons and second electrode acquires free electrons). **c.** Picture of real experimental setup of a TEG with a dielectric loss layer. **d.** Enlarged view of a TEG with ELRG setup

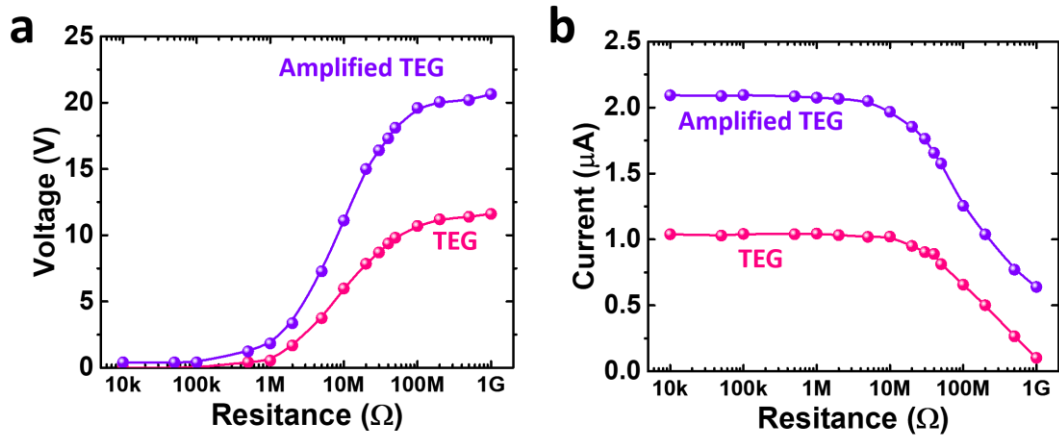

**Supplementary Figure 4 Voltage and current outputs from TEG under load resistances.** Load resistances are ranging from 10 kΩ to 1 GΩ. **a.** Plot showing voltage outputs. **b.** Plot showing current outputs

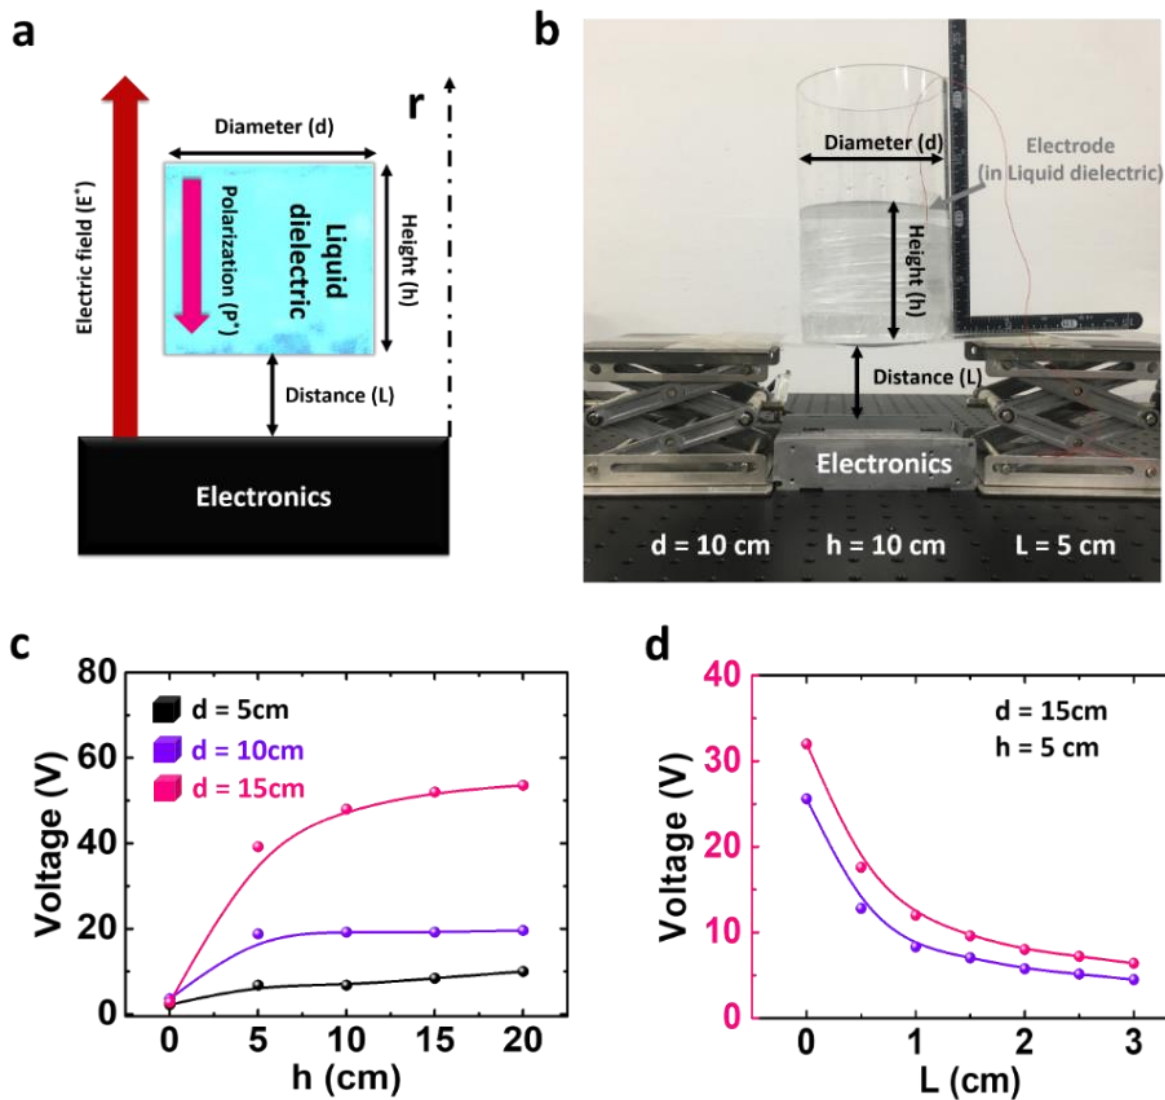

**Supplementary Figure 5 Comparison of the ELRG electric outputs under the geometry of the liquid dielectric.** **a.** Schematic illustration with geometric factors for measuring ELRG outputs. **b.** Image showing real setup under experimental condition of  $d = 10$  cm,  $h = 10$  cm, and  $L = 10$ . **c.** Plot showing voltage outputs under the consideration of sectional area and volume with  $L = 0$ . **d.** Plot showing voltage and current outputs under the consideration of distance between the liquid dielectric and electric system

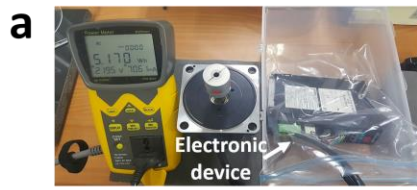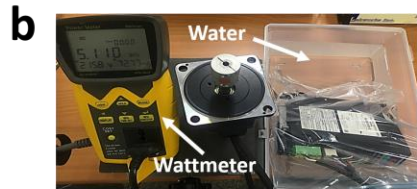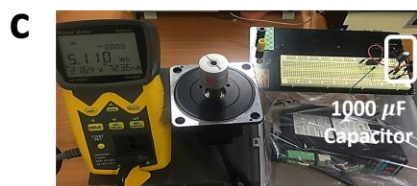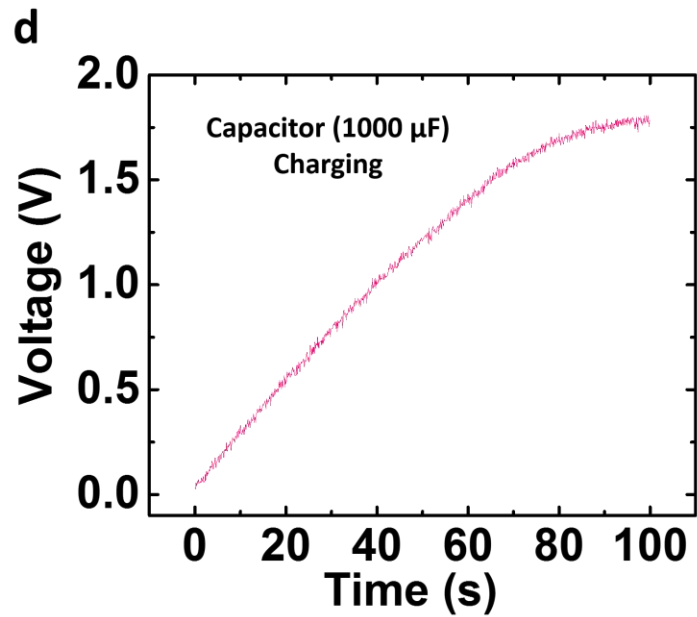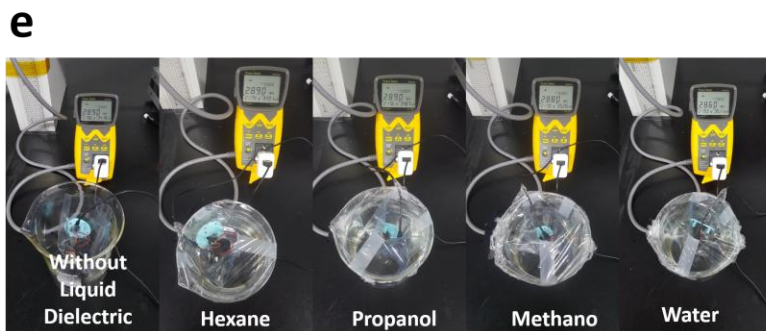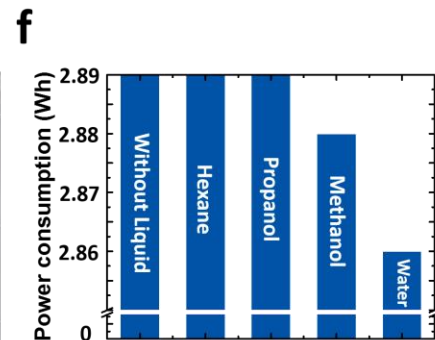

**Supplementary Figure 6** Experiment configuration to demonstrate ELRG effect. **a.** Experiment pictures. Without liquid dielectric / without charging; **b.** with liquid dielectric / without charging; and **c.** with liquid dielectric / with charging. **d.** Plot showing capacitor charging. **e.** Electronic device power consumption depending on various liquid dielectric materials with different thermal conductivity. **f.** Plot showing reduced power consumption when various liquid dielectrics are integrated

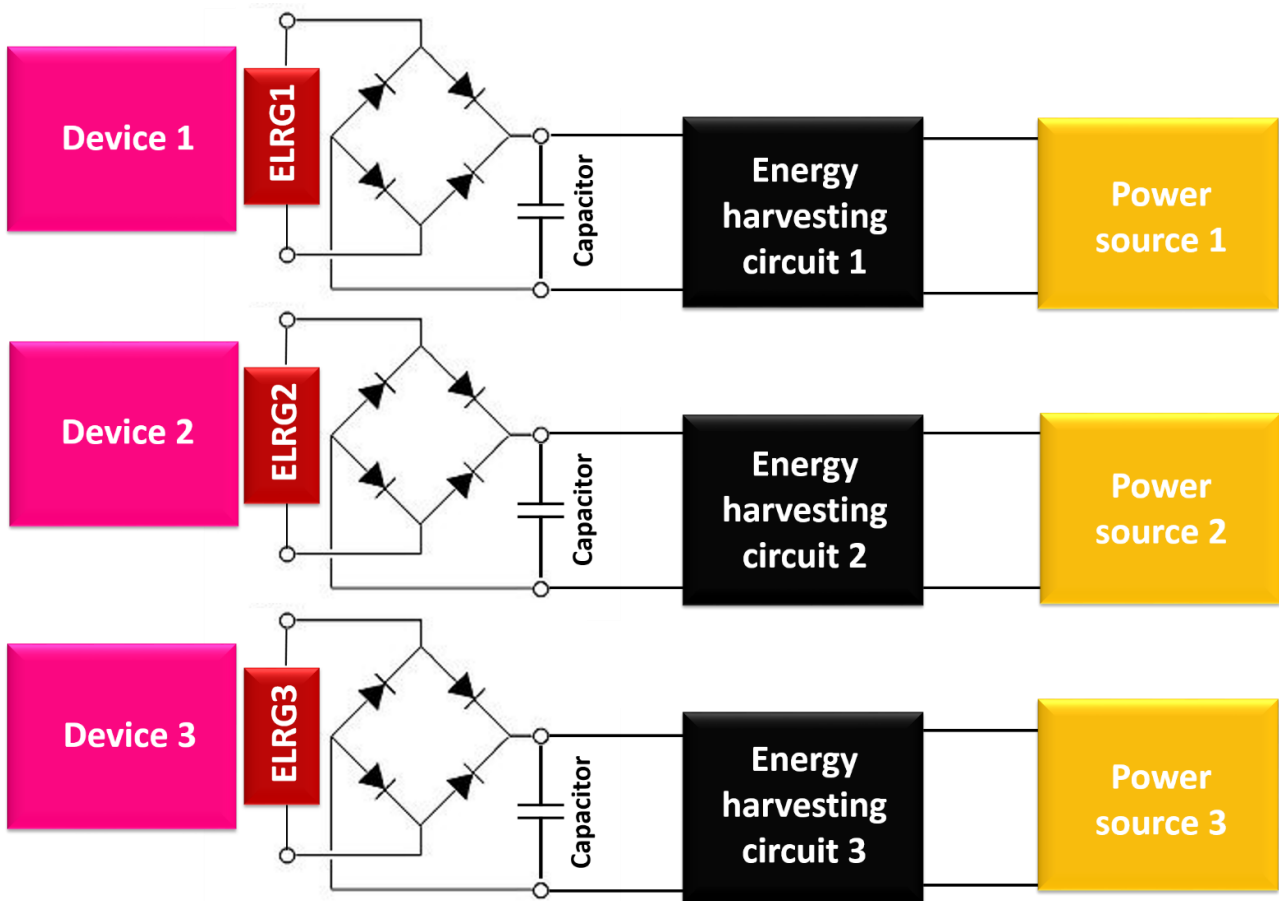

**Supplementary Figure 7 Schematic illustration of constructive energy harvesting model.** All electric devices are plugged into a 60-Hz AC input electrical source. Detailed electric outputs are given in Extended Data 8.



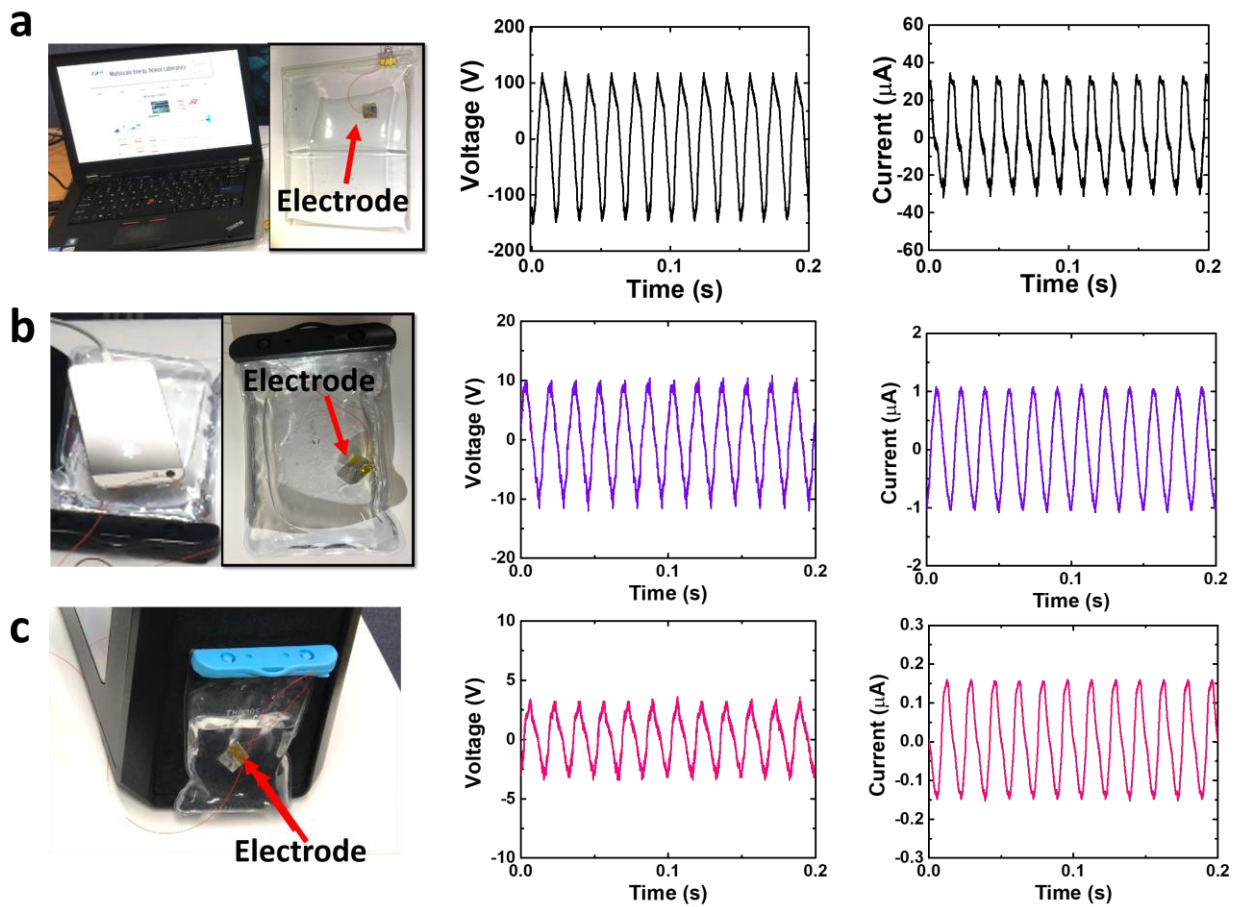

**Supplementary Figure 8 Voltage and current outputs from respective ELRG.** All electric devices are plugged into a 60-Hz AC input electrical source. **a.** Picture with ELRG-integrated laptop (left); plot showing open-circuit voltage (middle); short-circuit current (right). **b.** Picture with ELRG-integrated cell phone (left); plot showing open-circuit voltage (middle); short-circuit current (right). **c.** Picture with ELRG-integrated desk top (left); plot showing open-circuit voltage (middle); short-circuit current (right)

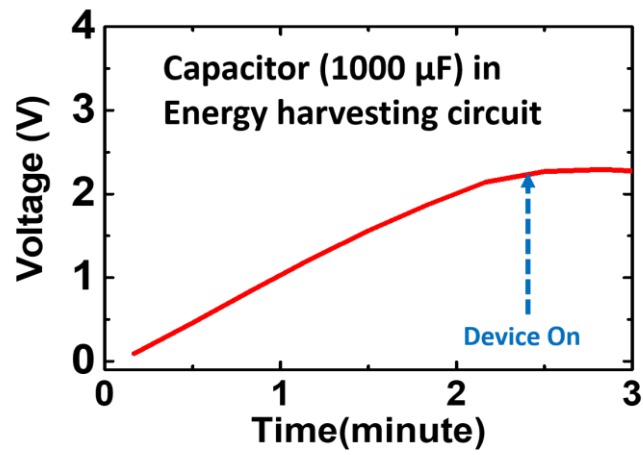

**Supplementary Figure 9** Capacitor (1000  $\mu\text{F}$ ) charging plot from ELRG. The capacitor is connected to the other electric system when the plot line is saturated

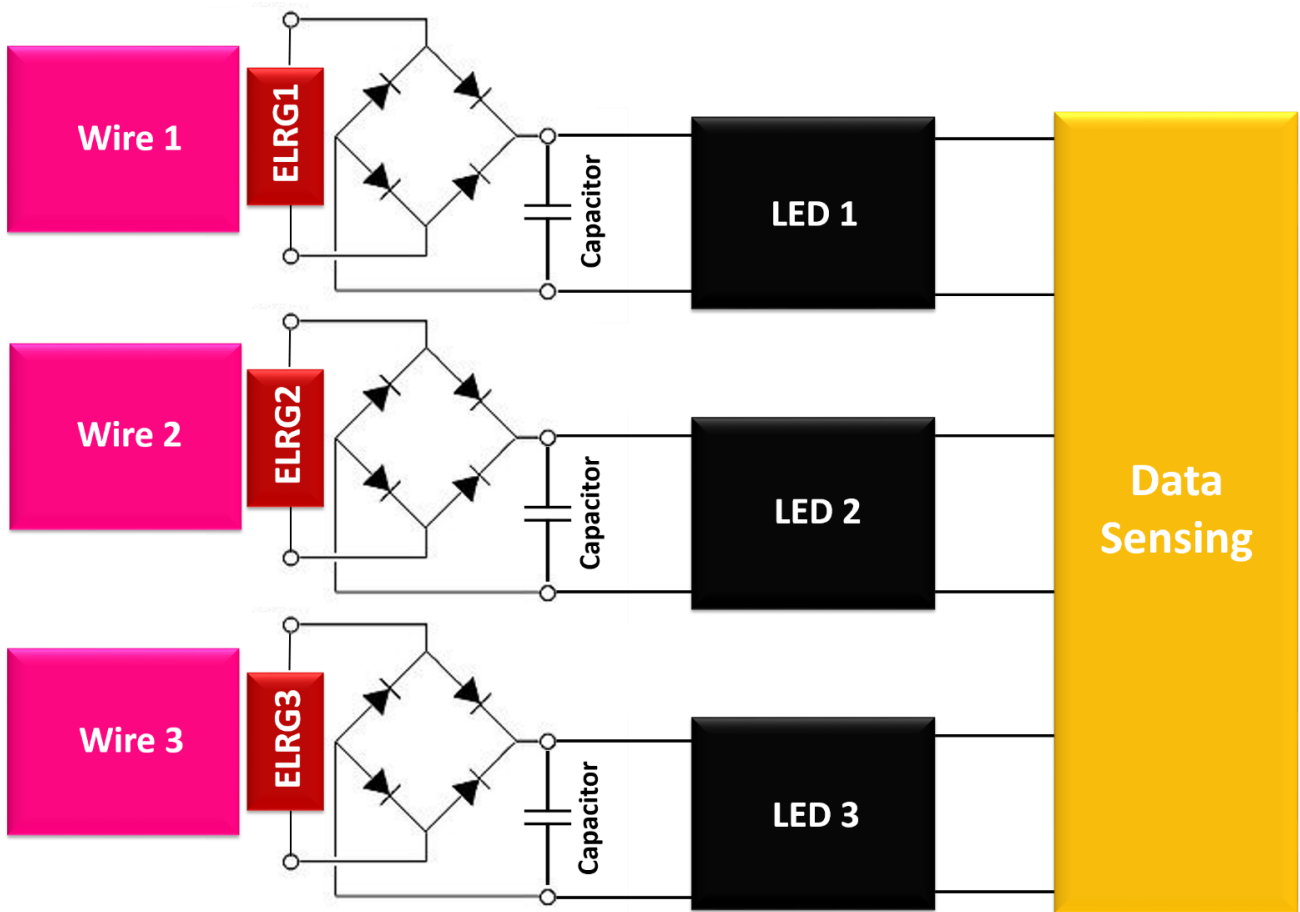

**Supplementary Figure 10** Schematic illustration of constructive self-powered wire sensing model. All electric devices are plugged into a 60-Hz AC input electrical source
