# Supplementary material for: Energy-loss return gate via liquid dielectric polarization
Source: PubMed Central journal article supplement (PMC5897353; doi:10.1038/s41467-018-03893-7), 2018-04-12
Supplement: 41467_2018_3893_MOESM3_ESM.pdf [file 41467_2018_3893_MOESM3_ESM.pdf]

## **Description of Additional Supplementary Files**

File Name: Supplementary Movie 1

Description: ELRG application for our daily lives

File Name: Supplementary Movie 2

Description: ELRG application for self-powered sensing system
